# Supplementary material for: The Effect of Malaria and HIV Co-Infection on Anemia: A Meta-Analysis
Source: PubMed Central journal article supplement — Medicine (Baltimore). 2016 Apr 8;95(14):e3205. doi: 10.1097/MD.0000000000003205 (PMC4998764; doi:10.1097/md.0000000000003205), 2016-04-08
Supplement: medi-95-e3205-s002.pdf [file medi-95-e3205-s002.pdf]

Supplemental Figure 1 Prevalence of coinfections stratified by age groups

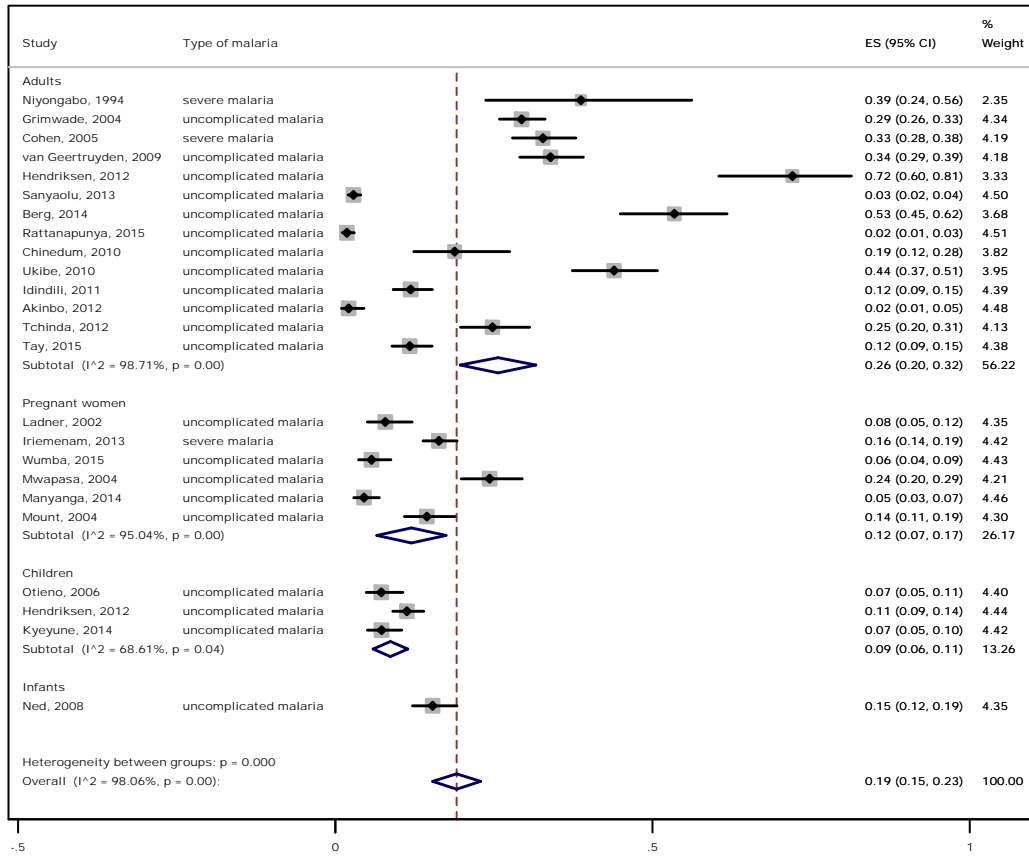

Table S1. Summary of excluded studies and reason for exclusion.

| <b>No.</b> | <b>Study</b>             | <b>Reasons<sup>+</sup></b>                       |
|------------|--------------------------|--------------------------------------------------|
| 1.         | Cuadros, 2011 [5]        | No data on anaemia                               |
| 2.         | Mouala, 2008 [6]         | No data on anaemia                               |
| 3.         | Hewitt, 2006 [8]         | Review                                           |
| 4.         | Blumberg, 2007 [9]       | Review                                           |
| 5.         | Simooya, 1988 [44]       | No data on anaemia                               |
| 6.         | Greenberg, 1991 [45]     | No data on anaemia                               |
| 7.         | Kalyesubula, 1997 [46]   | No data on anaemia                               |
| 8.         | Chandramohan, 1998 [47]  | Review                                           |
| 9.         | Bastos, 1999 [48]        | No data on anaemia                               |
| 10.        | French, 2000 [49]        | No data on anaemia                               |
| 11.        | Whitworth, 2000 [50]     | No data on anaemia                               |
| 12.        | Rowland-Jones, 2002 [51] | Review                                           |
| 13.        | Ayisi, 2003 [52]         | Not an association study                         |
| 14.        | Kassa, 2005 [53]         | No data on Hb in co-infected group               |
| 15.        | Kublin, 2005 [54]        | No data on anaemia in confected groups.          |
| 16.        | Patnaik, 2005 [55]       | No data on anaemia                               |
| 17.        | Bronzan, 2007 [56]       | No separate data on HIV and malaria co-infection |
| 18.        | Jaworowski, 2007 [57]    | No data on anaemia                               |
| 19.        | Mehta, 2008 [58]         | No data on anaemia                               |
| 20.        | Newman, 2009 [59]        | No data on anaemia                               |
| 21.        | Imani, 2011 [60]         | No data on anaemia                               |
| 22.        | Wariso, 2011 [61]        | No data on anaemia                               |

|     |                   |                                             |
|-----|-------------------|---------------------------------------------|
| 23. | Laar, 2013 [62]   | No separate data on Hb in both groups       |
| 24. | Turner, 2013 [63] | No separate data on Hb in co-infected group |

+ not meeting inclusion criteria and/or meeting exclusion criteria

**Table 2. The methodological assessment of the included studies in meta-analysis**

|    | <b>Domain assessment</b>                                                 |                                                                                                       |                                                                          |                                                                                |                                                                                    |                                                   |
|----|--------------------------------------------------------------------------|-------------------------------------------------------------------------------------------------------|--------------------------------------------------------------------------|--------------------------------------------------------------------------------|------------------------------------------------------------------------------------|---------------------------------------------------|
|    | <b>Selection bias caused by the inadequate selection of participants</b> | <b>Selection bias caused by the inadequate confirmation and consideration of confounding variable</b> | <b>Performance bias caused by the inadequate measurement of exposure</b> | <b>Detection bias caused by the inadequate blinding of outcome assessments</b> | <b>Attrition bias caused by the inadequate handling of incomplete outcome data</b> | <b>Reporting bias caused by selective outcome</b> |
|    | Low                                                                      | Unclear                                                                                               | Low                                                                      | Unclear                                                                        | Low                                                                                | Low                                               |
|    | High                                                                     | High                                                                                                  | Low                                                                      | Unclear                                                                        | Low                                                                                | Low                                               |
|    | High                                                                     | Low                                                                                                   | Low                                                                      | Unclear                                                                        | Low                                                                                | Low                                               |
|    | Low                                                                      | Unclear                                                                                               | Low                                                                      | Unclear                                                                        | Low                                                                                | Low                                               |
|    | Low                                                                      | Low                                                                                                   | Low                                                                      | Unclear                                                                        | Low                                                                                | Low                                               |
|    | Low                                                                      | Unclear                                                                                               | Low                                                                      | Unclear                                                                        | High                                                                               | Low                                               |
|    | Low                                                                      | Low                                                                                                   | Low                                                                      | Unclear                                                                        | Low                                                                                | Low                                               |
|    | Low                                                                      | Unclear                                                                                               | Low                                                                      | Unclear                                                                        | Low                                                                                | Low                                               |
| 2] | Low                                                                      | Unclear                                                                                               | Low                                                                      | Unclear                                                                        | Low                                                                                | Low                                               |
|    | Low                                                                      | Low                                                                                                   | Low                                                                      | Unclear                                                                        | High                                                                               | Low                                               |
|    | Low                                                                      | High                                                                                                  | Low                                                                      | Unclear                                                                        | Low                                                                                | Low                                               |
|    | Low                                                                      | Unclear                                                                                               | Low                                                                      | Unclear                                                                        | Low                                                                                | Low                                               |
|    | Low                                                                      | Low                                                                                                   | Low                                                                      | Unclear                                                                        | Low                                                                                | Low                                               |
|    | Low                                                                      | High                                                                                                  | Low                                                                      | Unclear                                                                        | Low                                                                                | Low                                               |
|    | Low                                                                      | Low                                                                                                   | Low                                                                      | Unclear                                                                        | Low                                                                                | Low                                               |
| 2  | Low                                                                      | Low                                                                                                   | Low                                                                      | Unclear                                                                        | Low                                                                                | Low                                               |
|    | Low                                                                      | High                                                                                                  | Low                                                                      | Unclear                                                                        | Low                                                                                | Low                                               |
|    | Low                                                                      | High                                                                                                  | Low                                                                      | Unclear                                                                        | Low                                                                                | Low                                               |

|    |     |      |     |         |      |     |
|----|-----|------|-----|---------|------|-----|
|    |     |      |     |         |      |     |
|    | Low | Low  | Low | Unclear | Low  | Low |
| .4 | Low | Low  | Low | Unclear | High | Low |
|    | Low | Low  | Low | Unclear | Low  | Low |
| ,  | Low | Low  | Low | Unclear | Low  | Low |
| ;  | Low | High | Low | Unclear | High | Low |

Source of domain assessment: [16]
